# Supplementary material
Source: publisher figshare collection journal article supplement (https://sage.figshare.com/ndownloader/files/20420604)
Supplement: Supplementary file 1 [file 20420604]

Online Supplementary Appendix 1: List of search terms used on PubMed

| Terms                                                                                                                                                                                                                                                                                                                                                                                                                                                                                                                                                                                                                                                             | Engine | Articles Found |
|-------------------------------------------------------------------------------------------------------------------------------------------------------------------------------------------------------------------------------------------------------------------------------------------------------------------------------------------------------------------------------------------------------------------------------------------------------------------------------------------------------------------------------------------------------------------------------------------------------------------------------------------------------------------|--------|----------------|
| ((competenc*[Title/Abstract] OR skills[Title/Abstract])) AND (assessment[Title/Abstract] OR validation[Title/Abstract]) AND research[Title/Abstract]                                                                                                                                                                                                                                                                                                                                                                                                                                                                                                              | PubMed | 6,459          |
| ((research skills OR research development[MeSH Terms]) AND (professional competence OR competency-based education[MeSH Terms])) AND graduate medical education[MeSH Terms]                                                                                                                                                                                                                                                                                                                                                                                                                                                                                        | PubMed | 2,457          |
| ((research[Title/Abstract] AND training[Title/Abstract] AND competencies[Title/Abstract] AND clinical)[Title/Abstract])                                                                                                                                                                                                                                                                                                                                                                                                                                                                                                                                           | PubMed | 625            |
| ((clinical research[Title/Abstract] OR medical research[Title/Abstract]) AND (competencies[Title/Abstract] OR skills[Title/Abstract]) AND (training[Title/Abstract] OR education[Title/Abstract]) AND (assessment[Title/Abstract] OR evaluation[Title/Abstract]))                                                                                                                                                                                                                                                                                                                                                                                                 | PubMed | 117            |
| ((("measurement of competency based research education"[Text Word] OR "self-assessment in research education"[Text Word] OR "research competencies"[Text Word] OR "assessing clinical research"[Text Word])) AND ("public health"[Text Word] OR "medical education"[Text Word] OR nursing[Text Word] OR pharmac*[Text Word] OR "public health"[Text Word] OR dentistry[Text Word] OR dental[Text Word])) AND (competence[Text Word] OR competencies[Text Word] OR "competency assessment"[Text Word] OR "educational measurement"[Text Word] OR "professional competence"[Text Word] OR "educational assessment"[Text Word] OR "learning assessment"[Text Word])) | PubMed | 31             |
| ((clinical research OR research design [MeSH Terms]) AND (medical education OR research/education OR Educational Measurement OR Translational Medical Research/education OR education, graduate OR graduate medical education[MeSH Terms])) AND competency based education[MeSH Terms])                                                                                                                                                                                                                                                                                                                                                                           | PubMed | 799            |
| "research competencies"[tw]                                                                                                                                                                                                                                                                                                                                                                                                                                                                                                                                                                                                                                       | PubMed | 69             |
| ((research[tw] AND training[tw] AND competencies[tw])))                                                                                                                                                                                                                                                                                                                                                                                                                                                                                                                                                                                                           | PubMed | 1,967          |
| ((Biomedical Research/education [MeSH Terms]) AND (professional competence OR Competency-Based Education/methods [MeSH Terms])) AND (Educational Measurement OR Program evaluation [MeSH Terms])                                                                                                                                                                                                                                                                                                                                                                                                                                                                  | PubMed | 564            |
